# Supplementary material for: Safety and efficacy of letetresgene autoleucel alone or with pembrolizumab for relapsed/refractory multiple myeloma
Source: PubMed Central journal article supplement — Blood Adv. 2022 Dec 20;7(7):1168–77. doi: 10.1182/bloodadvances.2022008460 (PMC10111356; doi:10.1182/bloodadvances.2022008460), 2022-12-20
Supplement: BLOODA_ADV-2022-008460-mmc1.pdf [file BLOODA_ADV-2022-008460-mmc1.pdf]

## 1 Supplemental Materials

## 2 Supplemental Methods

### 3 Supplemental assessments:

4 In patients who achieved  $\geq$  PR, the time to response (TTR; defined as the time from  
5 lete-cel infusion to initial date of confirmed response) and duration of response (DoR  
6 (time from the initial date of confirmed response to the date of progressive disease or  
7 death due to disease under study) were assessed.

8 Assessments for clinical response and progression were to be performed Q3W from  
9 ~~Week 3 to Week 24~~, then Q6W to Week 72, and then Q12W until confirmed disease  
10 progression, death, or study withdrawal. T-cell peak expansion ( $C_{max}$ ), time to  $C_{max}$   
11 ( $T_{max}$ ), and area under the curve (AUC) from zero to time t ( $AUC_{0-t}$ ) were assessed as  
12 secondary endpoints using DNA-based quantitative (q)PCR to estimate transgene copy  
13 numbers (copies/ $\mu$ g gDNA).

14 Exploratory endpoints included OS (defined as the time from lete-cel infusion to death  
15 due to any cause), lete-cel kinetics in peripheral blood mononuclear cells (PBMCs)  
16 and/or bone marrow samples, and serum cytokine levels pre- and post-lete-cel infusion  
17 (and their association with CRS and response). Serum samples were collected at  
18 baseline and at each visit post lete-cel infusion. For patients with suspected CRS,  
19 serum samples were collected approximately every other day until resolution or if an  
20 alternative diagnosis was established. Serum cytokines, including interleukin (IL)-6,  
21 interferon (IFN)- $\gamma$ , tumor necrosis factor (TNF)- $\alpha$ , IL-2R $\alpha$ , IL-10, IL-13, IL-1Ra, IL-8, IL-  
22 12, IL-15, IL-2, and granulocyte-macrophage colony-stimulating factor (GM-CSF), were  
23 measured by Meso Scale Discovery (MSD) immunoassay. At screening, bone marrow  
24 samples were assessed for NY-ESO-1/LAGE-1a expression via RNA-based RT-  
25 quantitative PCR.

### 26 Supplemental statistics:

27 Cytopenias were reported as pooled terms: anemia included anemia/red blood cell  
28 count decreased; leukopenia included leukopenia/white blood cell decreased;

29 thrombocytopenia included thrombocytopenia/platelet count decreased; lymphopenia  
30 included lymphopenia/lymphocyte count decreased; and neutropenia included  
31 neutropenia/neutrophil count decreased.

32 OS was not mature at the time of the analysis. The study was not powered to compare  
33 efficacy or safety data between the study arms. Results of all analyses were therefore  
34 summarized descriptively. Potential biomarker correlates of clinical response were  
35 summarized graphically in a post-hoc analysis as longitudinal profiles with the lower  
36 limit of detection displayed when applicable.

37

### 38 **Treatment-limiting toxicity (TLT) definition**

#### 39 **The following toxicities were considered to be TLTs:**

- 40 • Any  $\geq$  grade 4 adverse event (AE) except for the exclusions listed below:
  - 41 – Grade 3 non-infectious pneumonitis
  - 42 – Any other grade 3 AE (excluding pneumonitis) that does not improve to
  - 43 grade 2 within 7 days after onset despite medical management and
  - 44 supportive care
- 45 • Any AE that prevents dosing of pembrolizumab at Week 3, has not resolved to
- 46 an acceptable level by Week 6, and consequently precludes a subject
- 47 randomized to Arm 2 from initiating pembrolizumab was counted as a TLT
- 48 • An AE not listed above could be defined as a TLT after consultation with the
- 49 Sponsor, the Investigators, and the Safety Review Team based on the emerging
- 50 safety profile
- 51 • The following toxicities were not considered to be TLTs:
  - 52 – Grade 3/4 leukopenia, lymphopenia, neutropenia, or febrile neutropenia
  - 53 – Grade 3/4 thrombocytopenia not associated with significant bleeding
  - 54 – Grade 3 anemia
  - 55 – Grade 4 CRS or toxicities related to CRS resolving to grade  $\leq$  2 within 7
  - 56 days
  - 57 – Other grade 3 laboratory abnormality determined to be not clinically
  - 58 significant by the investigator

- 59                   – Grade 3/4 fever and chills
- 60                   – Grade 3/4 hypoalbuminemia or abnormal electrolytes responding to
- 61                   supplementation/correction
- 62                   – AEs related to the cancer or its progression

63 **Supplemental Table 1. Summary of treatment-emergent SAEs**

| Patients, n (%)                                                                                             | Arm 1<br>(lete-cel)<br>(N = 3) |              | Arm 2<br>(lete-cel +<br>pembrolizumab)<br>(N = 3) |              | Total<br>(N = 6) |              |
|-------------------------------------------------------------------------------------------------------------|--------------------------------|--------------|---------------------------------------------------|--------------|------------------|--------------|
|                                                                                                             | Total                          | Grade<br>≥ 3 | Total                                             | Grade<br>≥ 3 | Total            | Grade<br>≥ 3 |
| <b>Treatment-emergent SAEs</b>                                                                              | 2                              | 2 (67)       | 1 (33)                                            | 1 (33)       | 3 (50)           | 3 (50)       |
| Pancytopenia <sup>a</sup>  | (67)                           | 1 (33)       | 1 (33)                                            | 1 (33)       | 2 (33)           | 2 (33)       |
| Back pain                                                                                                   | 1                              | 1 (33)       | 0                                                 | 0            | 1 (17)           | 1 (17)       |
| Pneumonia                                                                                                   | (33)                           | 1 (33)       | 0                                                 | 0            | 1 (17)           | 1 (17)       |
| Tumor-related pain                                                                                          | 1                              | 1 (33)       | 0                                                 | 0            | 1 (17)           | 1 (17)       |
|                                                                                                             | (33)                           |              |                                                   |              |                  |              |
|                                                                                                             | 1                              |              |                                                   |              |                  |              |
|                                                                                                             | (33)                           |              |                                                   |              |                  |              |
|                                                                                                             | 1                              |              |                                                   |              |                  |              |
|                                                                                                             | (33)                           |              |                                                   |              |                  |              |

64

65 Treatment-emergent SAEs in the mITT population, including all patients who received lete-cel. Safety was assessed per NCI-  
 66 CTCAE Version 4.0.<sup>26</sup>

67 AE, adverse event; lete-cel, letetresgene autoleucel; mITT, modified intention-to-treat; N, patients in mITT population; n, patients  
 68 with available data; NCI-CTCAE, National Cancer Institute-Common Terminology Criteria for Adverse Events; SAE, serious adverse  
 69 event.

70 <sup>a</sup>Indicates a treatment-related AE, defined as those related to lymphodepletion or lete-cel infusion with definite, probable, and  
 71 possible study drug relationship; AEs are listed in descending order of total frequency.

72

73

74 **Supplemental Table 2. Response and PFS outcomes**

75

|                                    | <b>Arm 1<br/>(lete-cel)<br/>(N = 3)</b> | <b>Arm 2<br/>(lete-cel+<br/>pembrolizumab)<br/>(N = 3)</b> | <b>Total<br/>(N = 6)</b> |
|------------------------------------|-----------------------------------------|------------------------------------------------------------|--------------------------|
| <b>Best responses, n (%)</b>       |                                         |                                                            |                          |
| sCR                                | 0                                       | 0                                                          | 0                        |
| CR                                 | 1 (33)                                  | 0                                                          | 1 (17)                   |
| VGPR                               | 0                                       | 1 (33)                                                     | 1 (17)                   |
| PR                                 | 0                                       | 1 (33)                                                     | 1 (17)                   |
| SD                                 | 2 (67)                                  | 1 (33)                                                     | 3 (50)                   |
| <b>ORR, % (95% CI)<sup>a</sup></b> | 33.3%<br>(0.8–90.6%)                    | 66.7%<br>(9.4–99.2%)                                       | 50.0%<br>(11.8–88.2%)    |
| <b>PFS, range, months</b>          | n = 3<br>1.31–5.16                      | n = 2 <sup>b</sup><br>2.76–2.79                            | n = 5<br>1.31–5.16       |

76 Efficacy outcome in the mITT population, including all patients who received lete-cel.

77 CI, confidence interval; CR, complete response; IMWG, International Myeloma Working Group; lete-cel, letetresgene autoleucel;  
78 mITT, modified intention-to-treat; N, patients in mITT population; n, patients with available data; ORR, overall response rate; PFS,  
79 progression-free survival; PR, partial response; sCR, stringent complete response; SD, stable disease; VGPR, very good partial  
80 response.81 <sup>a</sup>ORR defined as a PR or better per IMWG Uniform Response Criteria 2016. 95% CI calculated using exact (Clopper-Pearson)  
82 method; <sup>b</sup>One patient was censored, follow-up ended at 2.1 months.

83

84

85

86

87 **Supplemental Figure 1. Study design**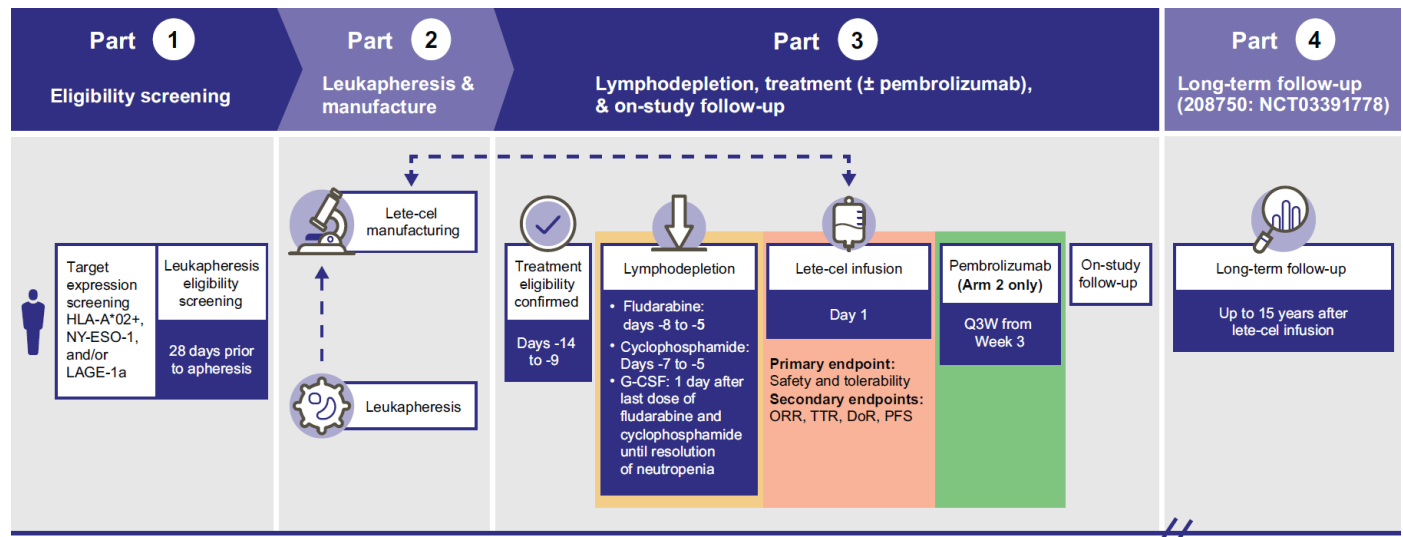

88

89 Study design schematic demonstrating the 3 parts of this study and long-term follow-up in a separate study. For the first 5 patients,  
90 enrollment was randomized 1:1 to Arms 1 and 2. Following protocol amendment and starting with patient 6, enrollment to Arm 1 was  
91 to be completed prior to resumption of enrollment into Arm 2.

92 DoR, duration of response; G-CSF, granulocyte colony-stimulating factor; HLA, human leukocyte antigen; LAGE-1a, L antigen  
93 family member 1 isoform A; lete-cel, letetresgene autoleucel; NY-ESO-1, New York esophageal squamous cell carcinoma-1; ORR,  
94 overall response rate; PFS, progression-free survival; Q3W, every 3 weeks; TTR, time to response.

95

96 **Supplemental Figure 2. Patient disposition**

97

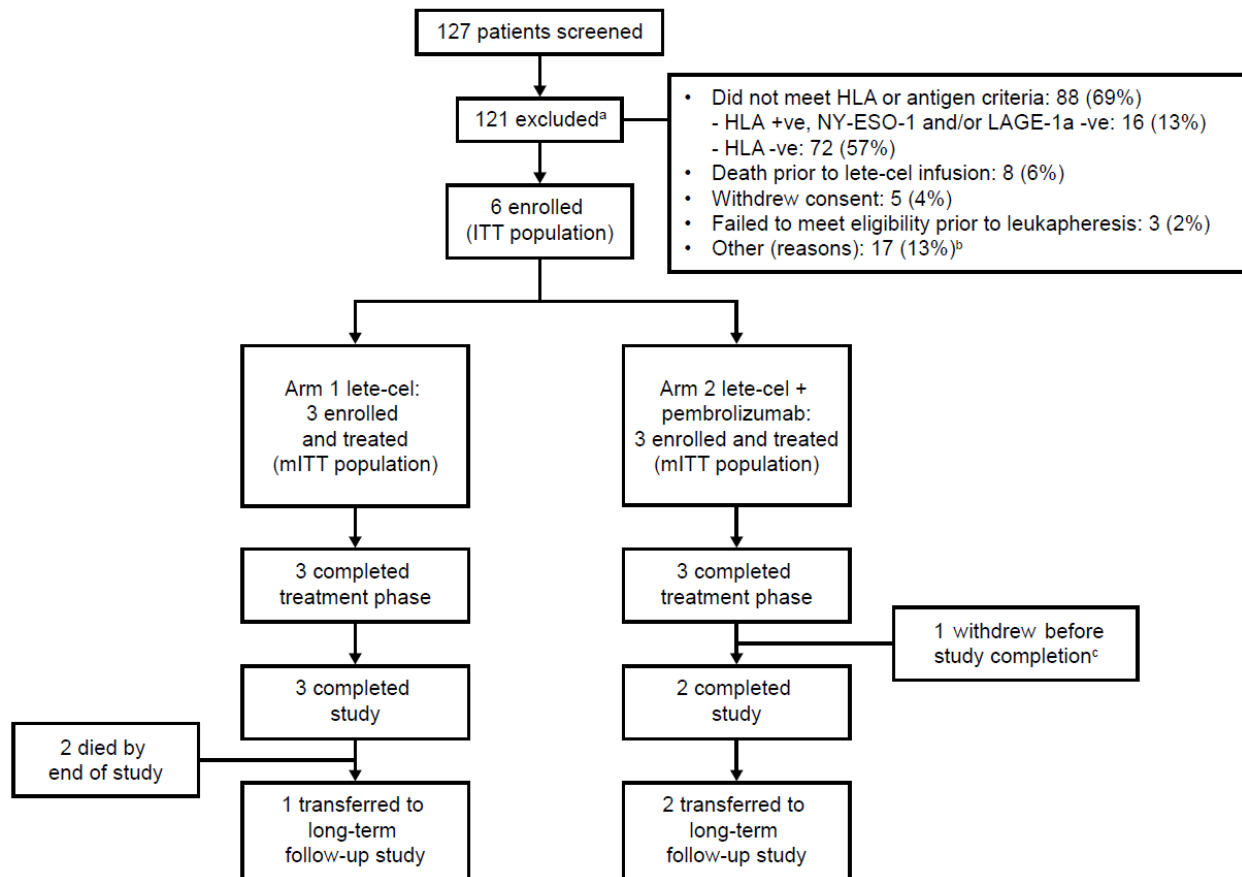

98

99 Patient disposition from screen in this study (NCT03168438) to transfer to long-term follow-up study (NCT03391778).

100 <sup>a</sup>Of the total 127 patients screened for HLA, 55 were positive for at least one of the eligible alleles. Of these 55 patients, 39 patients  
101 were identified as positive for antigen expression.102 <sup>b</sup>Other reasons included: bone marrow assessment not completed prior to enrollment closing (n = 6); did not meet other sponsor's  
103 requirements (n = 4); patient started other clinical trial (n = 3); investigator and sponsor decision (n = 1); had diagnosis of plasma  
104 cell leukemia (n = 1); patient passed away before consent could be obtained (n = 1); and ineligible due to cardiac assessment (n =  
105 1).106 <sup>c</sup>One patient in Arm 2 was withdrawn from the study (declined long-term follow-up) prior to completion of the treatment phase.

107 +ve, positive; -ve, negative; HLA, human leukocyte antigen; ITT, intention-to-treat; LAGE-1a, L antigen family member 1 isoform A;

108 lete-cel, letetresgene autoleucel; mITT, modified intention-to-treat; NY-ESO-1, New York esophageal squamous cell carcinoma-1.

109 **Supplemental Figure 3. Cytokine levels over time by patient**

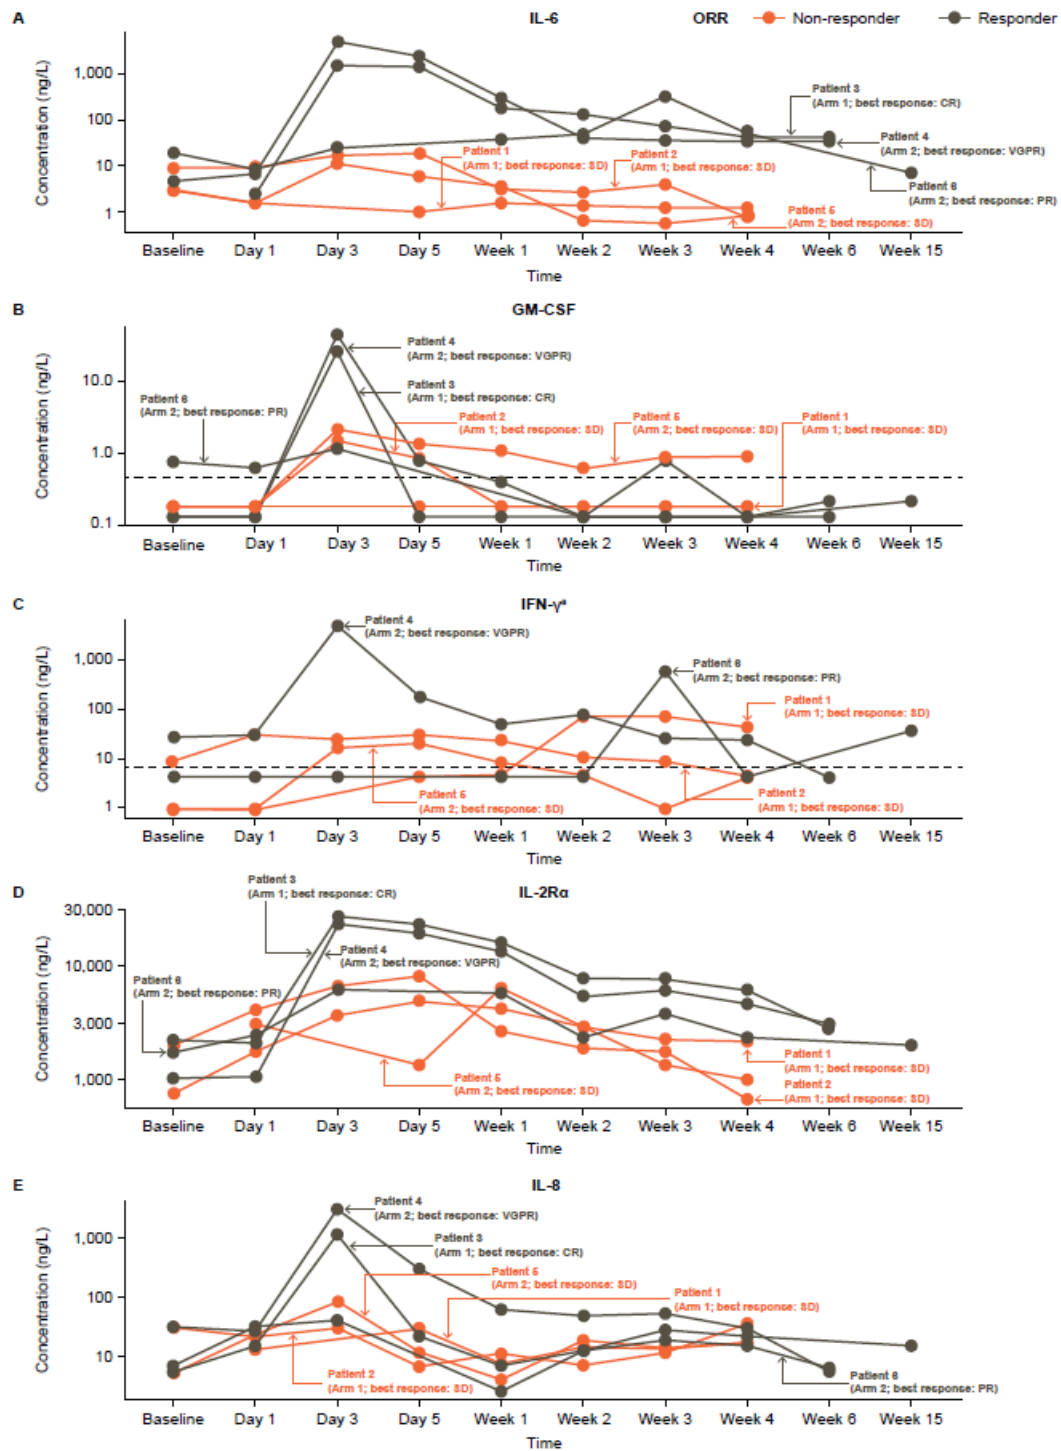

110

111 Expression of IL-6 (A), GM-CSF (B), IFN- $\gamma$  (C), IL-2R $\alpha$  (D), and IL-8 (E) over time in responders (brown lines, defined as patients  
112 who achieved an ORR [PR or better] per IMWG Uniform Response Criteria 2016) compared with non-responders (orange lines).

113 Dotted lines represent LLOQ.



GSK33777-1MS-00055275: APPROVAL

Lete-cel MM Study 470

- 114 CR, complete response; GM-CSF, granulocyte-macrophage colony-stimulating factor; IFN, interferon; IL, interleukin; IL-2R $\alpha$ ,  
115 interleukin-2 receptor alpha; lete-cel, letetresgene autoleucel; LLOQ, lower limit of quantitation; MM, multiple myeloma; PR, partial  
116 response; SD, stable disease; VGPR, very good partial response.  
117 <sup>a</sup>Patient 3 not shown (data only available at 1 timepoint).

118 **Supplemental Figure 4. Change in biomarker levels by patients**

A. Patient 1 (Arm 1; Best response: SD)

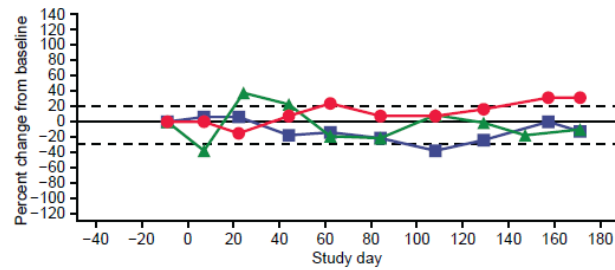

B. Patient 2 (Arm 1; Best response: SD)

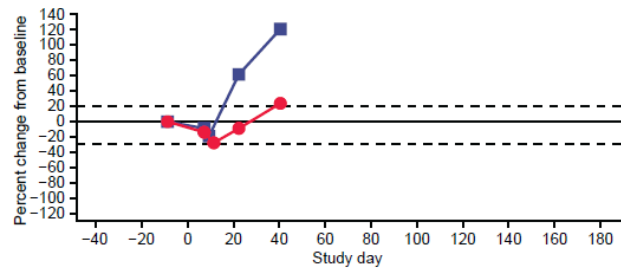

C. Patient 3 (Arm 1; Best response: CR)

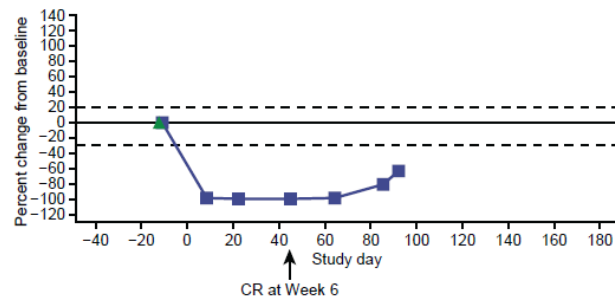

D. Patient 4 (Arm 2; Best response: VGPR)

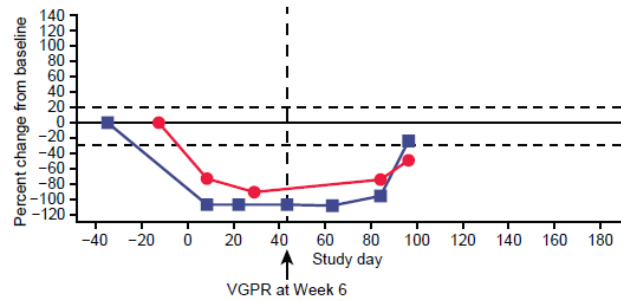

E. Patient 5 (Arm 2; Best response: SD)

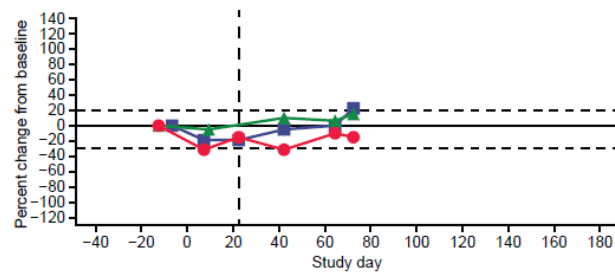

F. Patient 6 (Arm 2; Best response: PR)

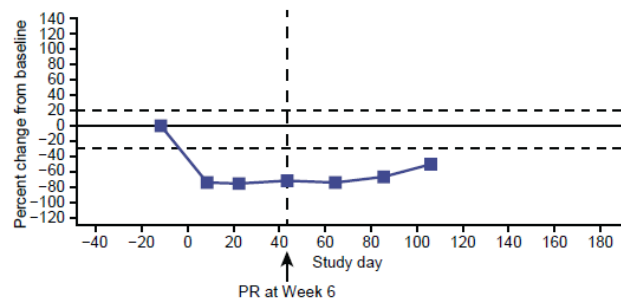

● Serum M-protein (g/L)    ▲ Urine M-protein Excretion Rate-24hr (g/day)    ■ FLC Difference

119

120

121 Percent change in serum M-protein (g/L; red line), urine monoclonal protein excretion rate – 24hr (g/day; green line), and free light

122 chain (blue line) in all patients with available data (Arm 1: patients 1–3 [A-C]; Arm 2: patients 4–6 [D-F]). Vertical dotted lines for

123 patients 4–6 indicate the date of first pembrolizumab dose. Clinical response per IMWG Uniform Response Criteria 2016.

124 CR, complete response; FLC, free light chain; M-protein, myeloma protein, PR, partial response; SD, stable disease; VGPR, very

125 good partial response.

126

127

128 **Supplemental Figure 5. T-cell persistence over time in individual patients**

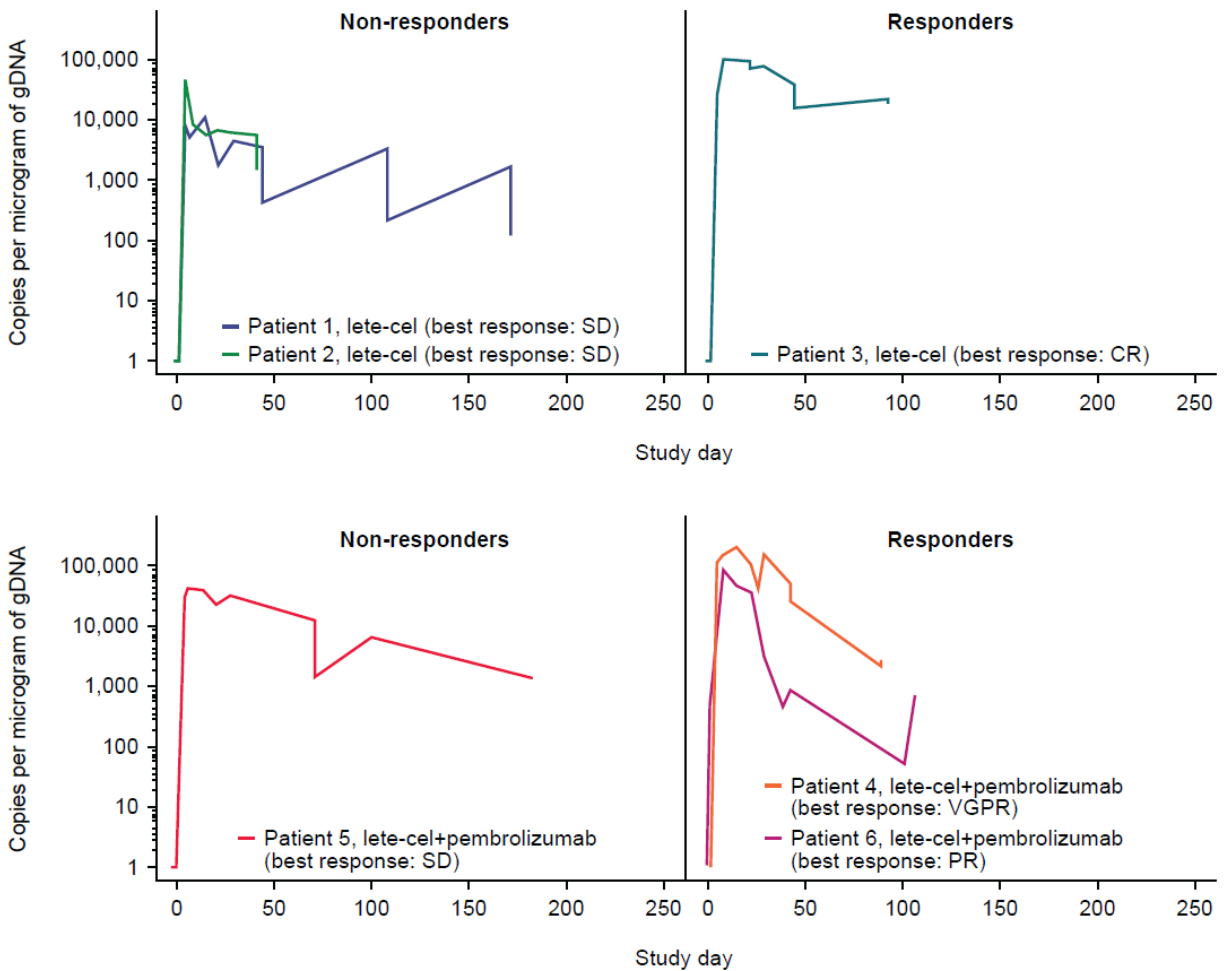

129

130 T-cell persistence over time in responders and non-responders in each treatment arm. Clinical response defined as a  $\geq$  PR per  
 131 IMWG Uniform Response Criteria 2016).

132 CR, complete response; gDNA, genomic DNA; IMWG, International Myeloma Working Group; lete-cel, letetresgene autoleucel; PR,  
 133 partial response; SD, stable disease; VGPR, very good partial response.

134
